# Supplementary material for: Whole genome methylation profiles as independent markers of survival in stage IIIC melanoma patients
Source: PubMed Central journal article supplement (PMC3539917; doi:10.1186/1479-5876-10-185), 2012-09-05
Supplement: 1479-5876-10-185-S1.pdf [file 1479-5876-10-185-S1.pdf]

**Additional file 1.** Biological pathways significantly over-represented in genes differentially methylated between HM and LM CM patients

| <b>KEGG pathway</b>                       | <b>KEGGID<sub>1</sub></b> | <b>P-value</b> |
|-------------------------------------------|---------------------------|----------------|
| Cytokine-cytokine receptor interaction    | 4060                      | 1.32E-16       |
| Neuroactive ligand-receptor interaction   | 4080                      | 3.12E-14       |
| Hematopoietic cell lineage                | 4640                      | 1.04E-09       |
| Autoimmune thyroid disease                | 5320                      | 4.39E-07       |
| Retinol metabolism                        | 830                       | 1.25E-06       |
| Linoleic acid metabolism                  | 591                       | 1.31E-06       |
| Drug metabolism - cytochrome P450         | 982                       | 9.22E-06       |
| Fat digestion and absorption              | 4975                      | 1.27E-05       |
| Olfactory transduction                    | 4740                      | 1.52E-05       |
| Staphylococcus aureus infection           | 5150                      | 0.00016        |
| Steroid hormone biosynthesis              | 140                       | 0.000227       |
| Drug metabolism - other enzymes           | 983                       | 0.000253       |
| Malaria                                   | 5144                      | 0.000319       |
| Caffeine metabolism                       | 232                       | 0.000378       |
| Cell adhesion molecules (CAMs)            | 4514                      | 0.000481       |
| Asthma                                    | 5310                      | 0.000611       |
| Rheumatoid arthritis                      | 5323                      | 0.000718       |
| Pancreatic secretion                      | 4972                      | 0.000801       |
| Natural killer cell mediated cytotoxicity | 4650                      | 0.000821       |

<sub>1</sub> univocal KEGG pathway identifier
