# Supplementary material for: Whole genome methylation profiles as independent markers of survival in stage IIIC melanoma patients
Source: PubMed Central journal article supplement (PMC3539917; doi:10.1186/1479-5876-10-185), 2012-09-05
Supplement: 1479-5876-10-185-S2.pdf [file 1479-5876-10-185-S2.pdf]

**Additional file 2.** Biological processes significantly over-represented in genes differentially methylated between HM and LM CM patients

| <b>Biological Process</b>                                                                                                      | <b>GOBPID1</b>    | <b>P-value</b>  |
|--------------------------------------------------------------------------------------------------------------------------------|-------------------|-----------------|
| system process                                                                                                                 | GO:0003008        | 7.32E-16        |
| sensory perception                                                                                                             | GO:0007600        | 9.59E-16        |
| ion transport                                                                                                                  | GO:0006811        | 6.02E-11        |
| cell-cell signaling                                                                                                            | GO:0007267        | 2.23E-10        |
| <b>immune response2</b>                                                                                                        | <b>GO:0006955</b> | <b>5.85E-10</b> |
| homeostatic process                                                                                                            | GO:0042592        | 9.94E-09        |
| cellular calcium ion homeostasis                                                                                               | GO:0006874        | 1.31E-08        |
| ion homeostasis                                                                                                                | GO:0050801        | 1.71E-08        |
| response to other organism                                                                                                     | GO:0051707        | 1.75E-08        |
| <b>inflammatory response</b>                                                                                                   | <b>GO:0006954</b> | <b>3.08E-08</b> |
| G-protein coupled receptor protein signaling pathway                                                                           | GO:0007186        | 5.06E-08        |
| <b>defense response to bacterium</b>                                                                                           | <b>GO:0042742</b> | <b>5.46E-08</b> |
| sensory perception of smell                                                                                                    | GO:0007608        | 8.33E-08        |
| metal ion homeostasis                                                                                                          | GO:0055065        | 8.36E-08        |
| epidermal cell differentiation                                                                                                 | GO:0009913        | 1.14E-07        |
| cellular chemical homeostasis                                                                                                  | GO:0055082        | 3.08E-07        |
| digestion                                                                                                                      | GO:0007586        | 3.69E-07        |
| cellular cation homeostasis                                                                                                    | GO:0030003        | 3.95E-07        |
| cellular defense response                                                                                                      | GO:0006968        | 3.95E-07        |
| divalent inorganic cation homeostasis                                                                                          | GO:0072507        | 4.52E-07        |
| muscle system process                                                                                                          | GO:0003012        | 5.56E-07        |
| muscle filament sliding                                                                                                        | GO:0030049        | 1.06E-06        |
| actin-mediated cell contraction                                                                                                | GO:0070252        | 1.06E-06        |
| keratinization                                                                                                                 | GO:0031424        | 1.64E-06        |
| detection of stimulus                                                                                                          | GO:0051606        | 1.75E-06        |
| positive regulation of cell proliferation                                                                                      | GO:0008284        | 2.16E-06        |
| elevation of cytosolic calcium ion concentration                                                                               | GO:0007204        | 3.15E-06        |
| visual perception                                                                                                              | GO:0007601        | 3.73E-06        |
| epidermis development                                                                                                          | GO:0008544        | 5.11E-06        |
| excretion                                                                                                                      | GO:0007588        | 5.33E-06        |
| xenobiotic metabolic process                                                                                                   | GO:0006805        | 7.03E-06        |
| response to xenobiotic stimulus                                                                                                | GO:0009410        | 8.93E-06        |
| epithelial cell differentiation                                                                                                | GO:0030855        | 9.63E-06        |
| biological adhesion                                                                                                            | GO:0022610        | 1.22E-05        |
| regulation of response to external stimulus                                                                                    | GO:0032101        | 1.56E-05        |
| synaptic transmission                                                                                                          | GO:0007268        | 1.84E-05        |
| multicellular organismal process                                                                                               | GO:0032501        | 1.94E-05        |
| response to stimulus                                                                                                           | GO:0050896        | 2.05E-05        |
| <b>positive regulation of immune system process</b>                                                                            | <b>GO:0002684</b> | <b>2.08E-05</b> |
| metal ion transport                                                                                                            | GO:0030001        | 2.24E-05        |
| signal transduction                                                                                                            | GO:0007165        | 2.26E-05        |
| terpenoid metabolic process                                                                                                    | GO:0006721        | 2.31E-05        |
| positive regulation of lipase activity                                                                                         | GO:0060193        | 2.89E-05        |
| regulation of cell activation                                                                                                  | GO:0050865        | 3.18E-05        |
| multicellular organismal signaling                                                                                             | GO:0035637        | 3.23E-05        |
| <b>regulation of immune response</b>                                                                                           | <b>GO:0050776</b> | <b>3.32E-05</b> |
| positive regulation of phospholipase C activity                                                                                | GO:0010863        | 3.99E-05        |
| retinoid metabolic process                                                                                                     | GO:0001523        | 4.15E-05        |
| regulation of hormone levels                                                                                                   | GO:0010817        | 5.16E-05        |
| phototransduction, visible light                                                                                               | GO:0007603        | 5.69E-05        |
| activation of phospholipase C activity by G-protein coupled receptor protein signaling pathway coupled to IP3 second messenger | GO:0007200        | 5.77E-05        |
| <b>leukocyte migration</b>                                                                                                     | <b>GO:0050900</b> | <b>5.97E-05</b> |
| second-messenger-mediated signaling                                                                                            | GO:0019932        | 6.39E-05        |
| cyclic nucleotide metabolic process                                                                                            | GO:0009187        | 6.49E-05        |
| regulation of transport                                                                                                        | GO:0051049        | 6.53E-05        |
| <b>leukocyte differentiation</b>                                                                                               | <b>GO:0002521</b> | <b>7.98E-05</b> |
| actin filament-based movement                                                                                                  | GO:0030048        | 8.23E-05        |
| signal release                                                                                                                 | GO:0023061        | 8.31E-05        |
| negative regulation of endopeptidase activity                                                                                  | GO:0010951        | 9.91E-05        |
| regulation of phospholipase activity                                                                                           | GO:0010517        | 0.00010543      |
| killing of cells of other organism                                                                                             | GO:0031640        | 0.00010739      |
| detection of light stimulus                                                                                                    | GO:0009583        | 0.000109824     |

|                                                                    |                   |                    |
|--------------------------------------------------------------------|-------------------|--------------------|
| cell chemotaxis                                                    | GO:0060326        | 0.000113183        |
| <b>humoral immune response</b>                                     | <b>GO:0006959</b> | <b>0.000122062</b> |
| hormone biosynthetic process                                       | GO:0042446        | 0.000135912        |
| protein activation cascade                                         | GO:0072376        | 0.000136801        |
| <b>regulation of interleukin-8 production</b>                      | <b>GO:0032677</b> | <b>0.000148498</b> |
| positive regulation of calcium-mediated signaling                  | GO:0050850        | 0.000148498        |
| <b>leukocyte activation</b>                                        | <b>GO:0045321</b> | <b>0.000166592</b> |
| G-protein signaling, coupled to cyclic nucleotide second messenger | GO:0007187        | 0.000168609        |
| blood circulation                                                  | GO:0008015        | 0.000194988        |
| <b>regulation of lymphocyte activation</b>                         | <b>GO:0051249</b> | <b>0.000195483</b> |
| protein-lipid complex remodeling                                   | GO:0034368        | 0.000195734        |
| response to chemical stimulus                                      | GO:0042221        | 0.000200251        |
| acute-phase response                                               | GO:0006953        | 0.000205195        |
| transmembrane transport                                            | GO:0055085        | 0.000214325        |
| organ morphogenesis                                                | GO:0009887        | 0.000236177        |
| induction of apoptosis by hormones                                 | GO:0008628        | 0.000239587        |
| urea transport                                                     | GO:0015840        | 0.000239587        |
